# Supplementary material
Source: ML conference proceedings conference paper supplement (https://openaccess.thecvf.com/content/CVPR_2019/html/Qi_Amodal_Instance_Segmentation_CVPR_2019_paper.html)
Supplement: Supplementary file 1 [file Qi_Amodal_Instance_Segmentation_CVPR_2019_supplemental.pdf]

# Supplementary File for Amodal Segmentation Network

## 1. Evaluation Result

The per-class results are shown in Table 1.

| type       | Mask R-CNN |        |         | Mask R-CNN + ASN |        |         |
|------------|------------|--------|---------|------------------|--------|---------|
|            | Det        | Amodal | Inmodal | Det              | Amodal | Inmodal |
| all        | 31.3       | 29.3   | 26.6    | 32.7             | 31.3   | 28.7    |
| cyclist    | 40.1       | 35.8   | 34.8    | 42.0             | 38.7   | 37.6    |
| pedestrian | 34.6       | 31.1   | 29.2    | 36.0             | 32.9   | 30.9    |
| car        | 49.7       | 49.6   | 43.5    | 51.3             | 51.5   | 45.9    |
| tram       | 10.9       | 13.2   | 11.1    | 12.8             | 15.6   | 14.2    |
| truck      | 8.4        | 8.9    | 8.7     | 10.9             | 11.4   | 11.3    |
| van        | 26.3       | 26.7   | 21.6    | 25.8             | 26.2   | 22.7    |
| misc       | 48.9       | 40.1   | 37.6    | 49.8             | 41.5   | 38.5    |

Table 1. Per-class results of Mask R-CNN w/ and w/o ASN.

## 2. Visualization of ASN

As shown in Fig. 1, 2, 3 and 4, our model can generate amodal and inmodal masks simultaneously. It also manifests that the instance outlines can be predicted under partial occlusion. The common error mode for amodal mask is the inaccuracy on small separate components such as wheels of vehicles. Predicting them accurately is hard even for human. The network prefers to generate common large-scale structure for better convergence.

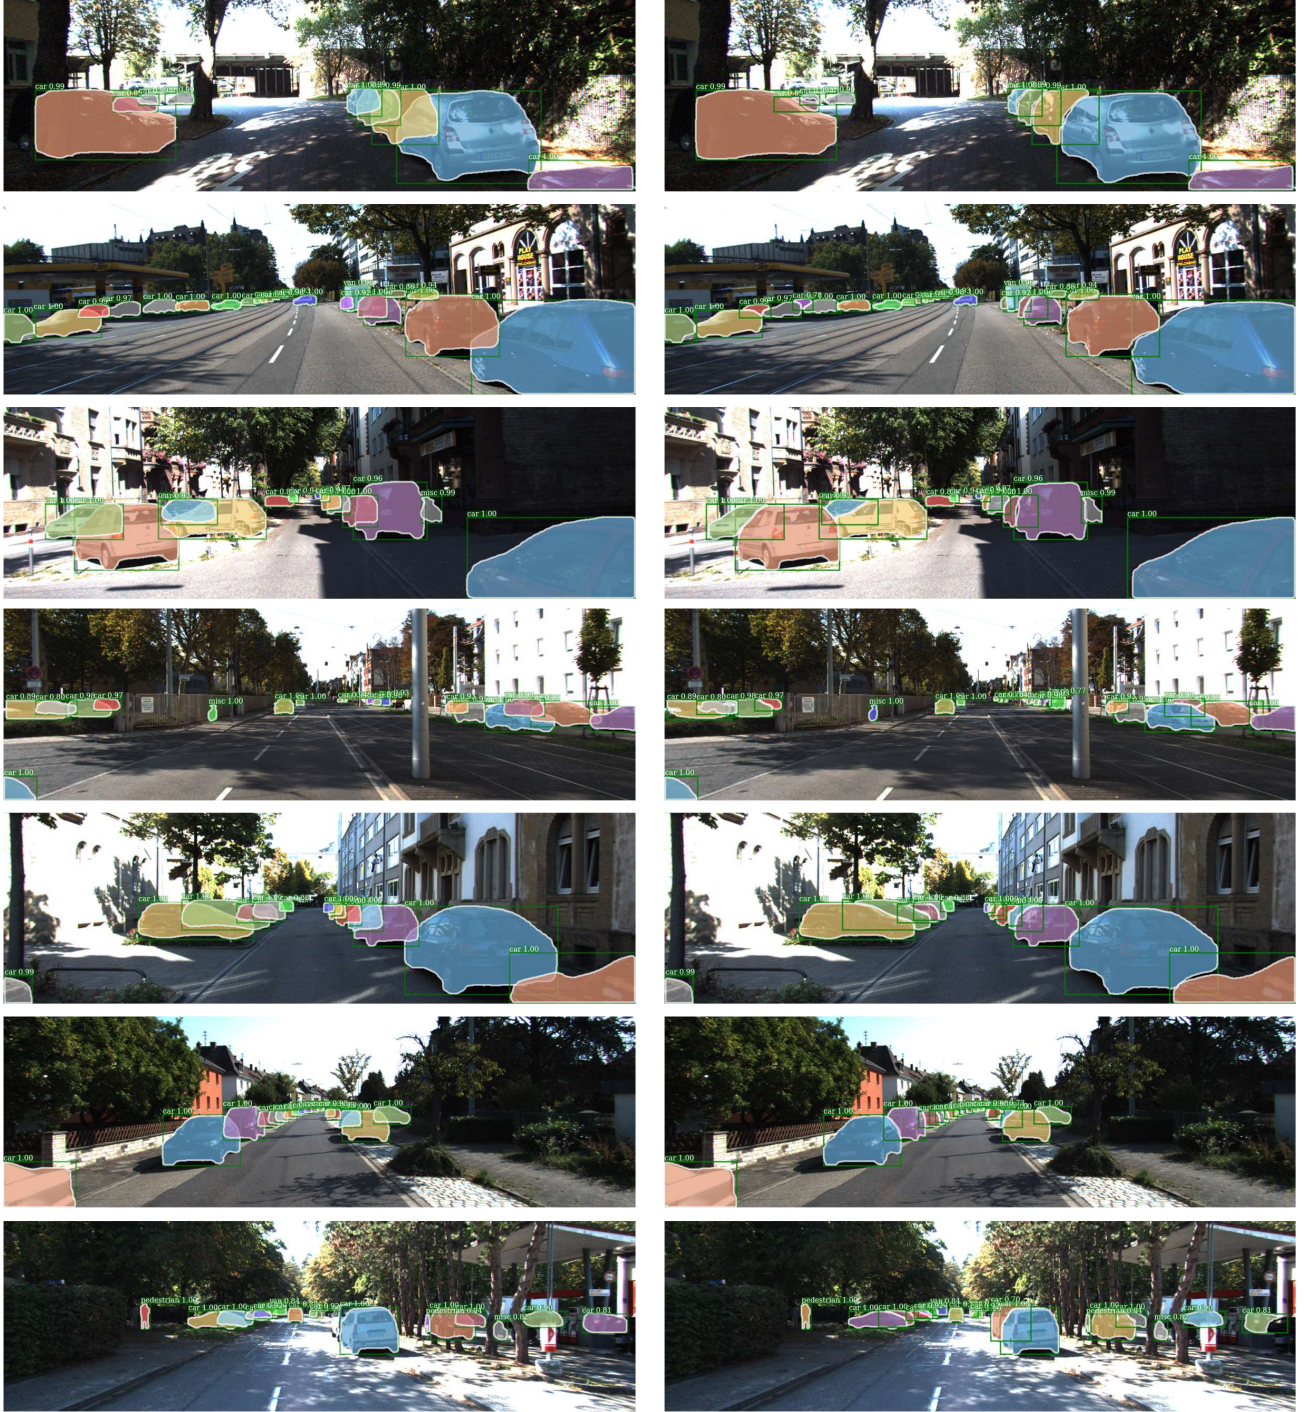

(a) (b)

Figure 1. The Visualization of amodal segmentation network on KINS. (a) Amodal mask. (b) Inmodal mask.



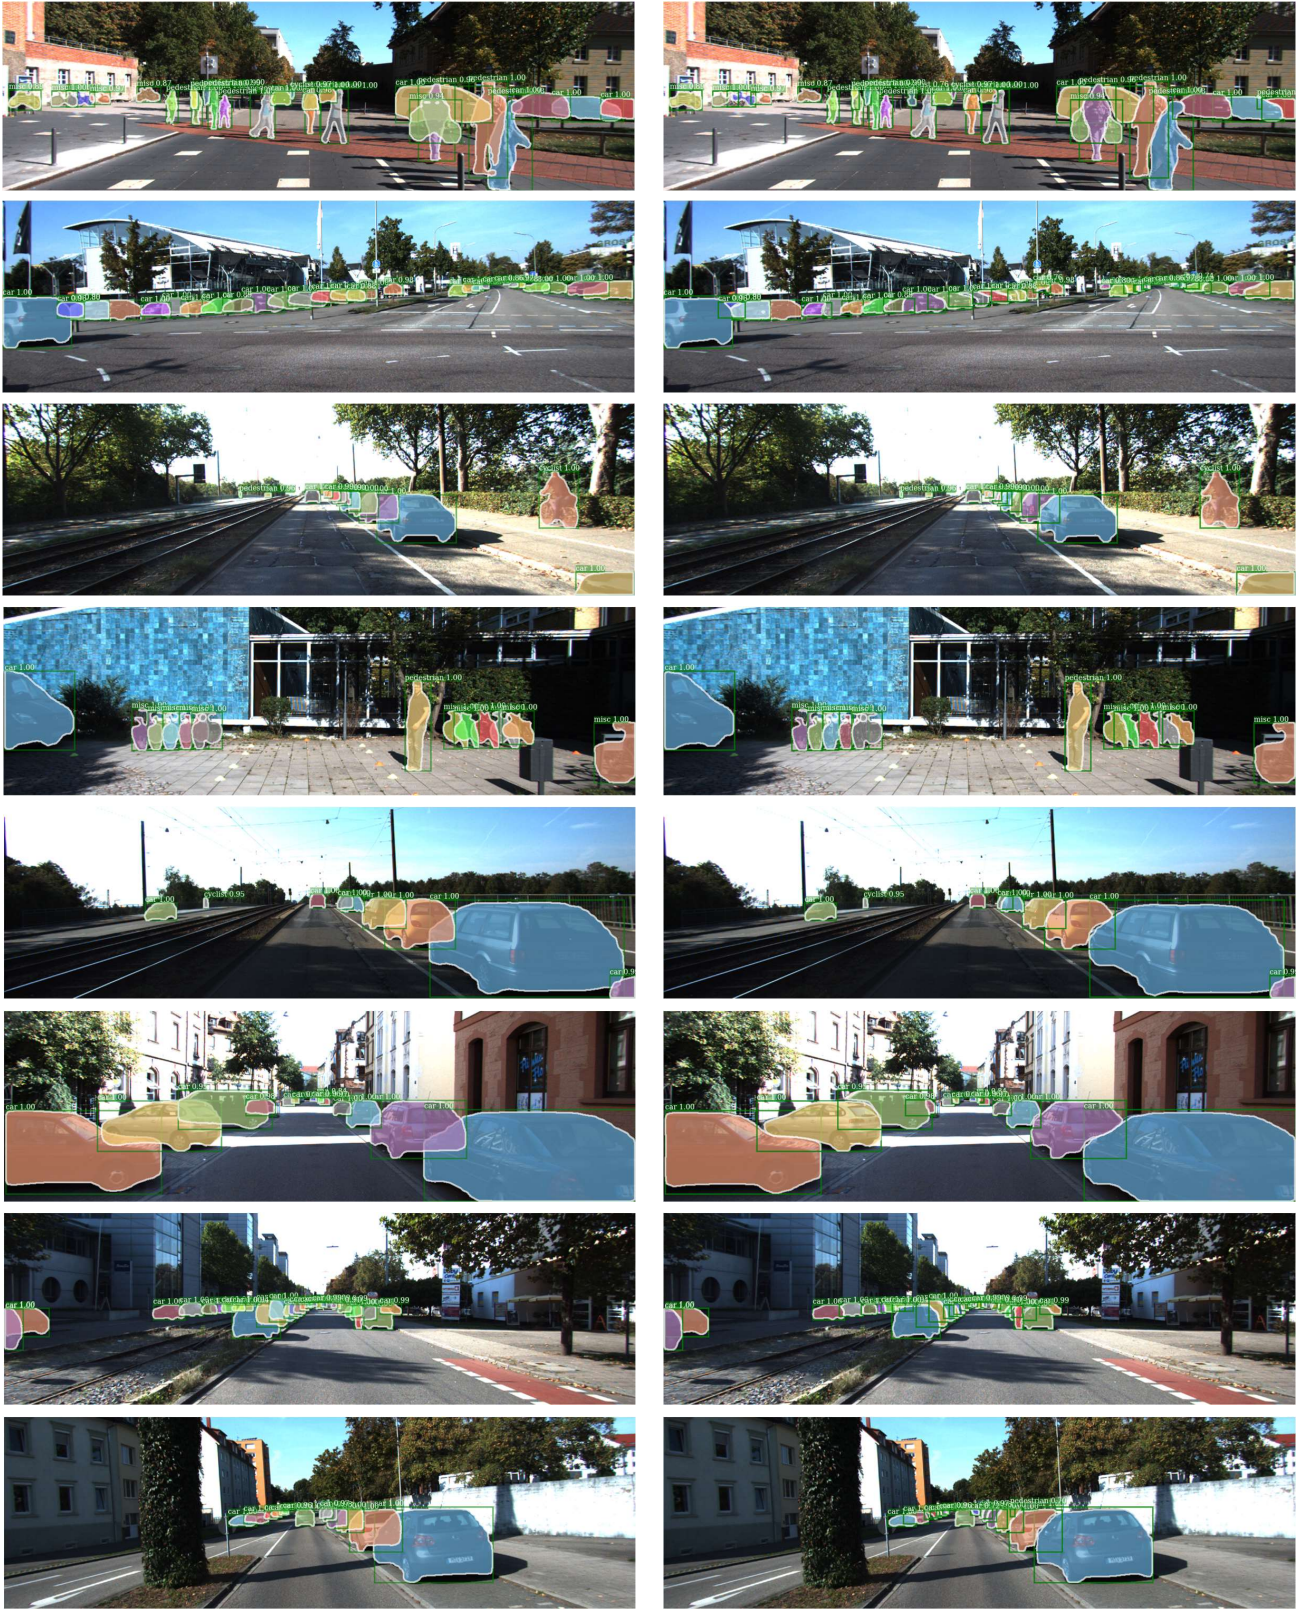

(a) (b)

Figure 2. The Visualization of amodal segmentation network on KINS. (a) Amodal mask. (b) Inmodal mask.



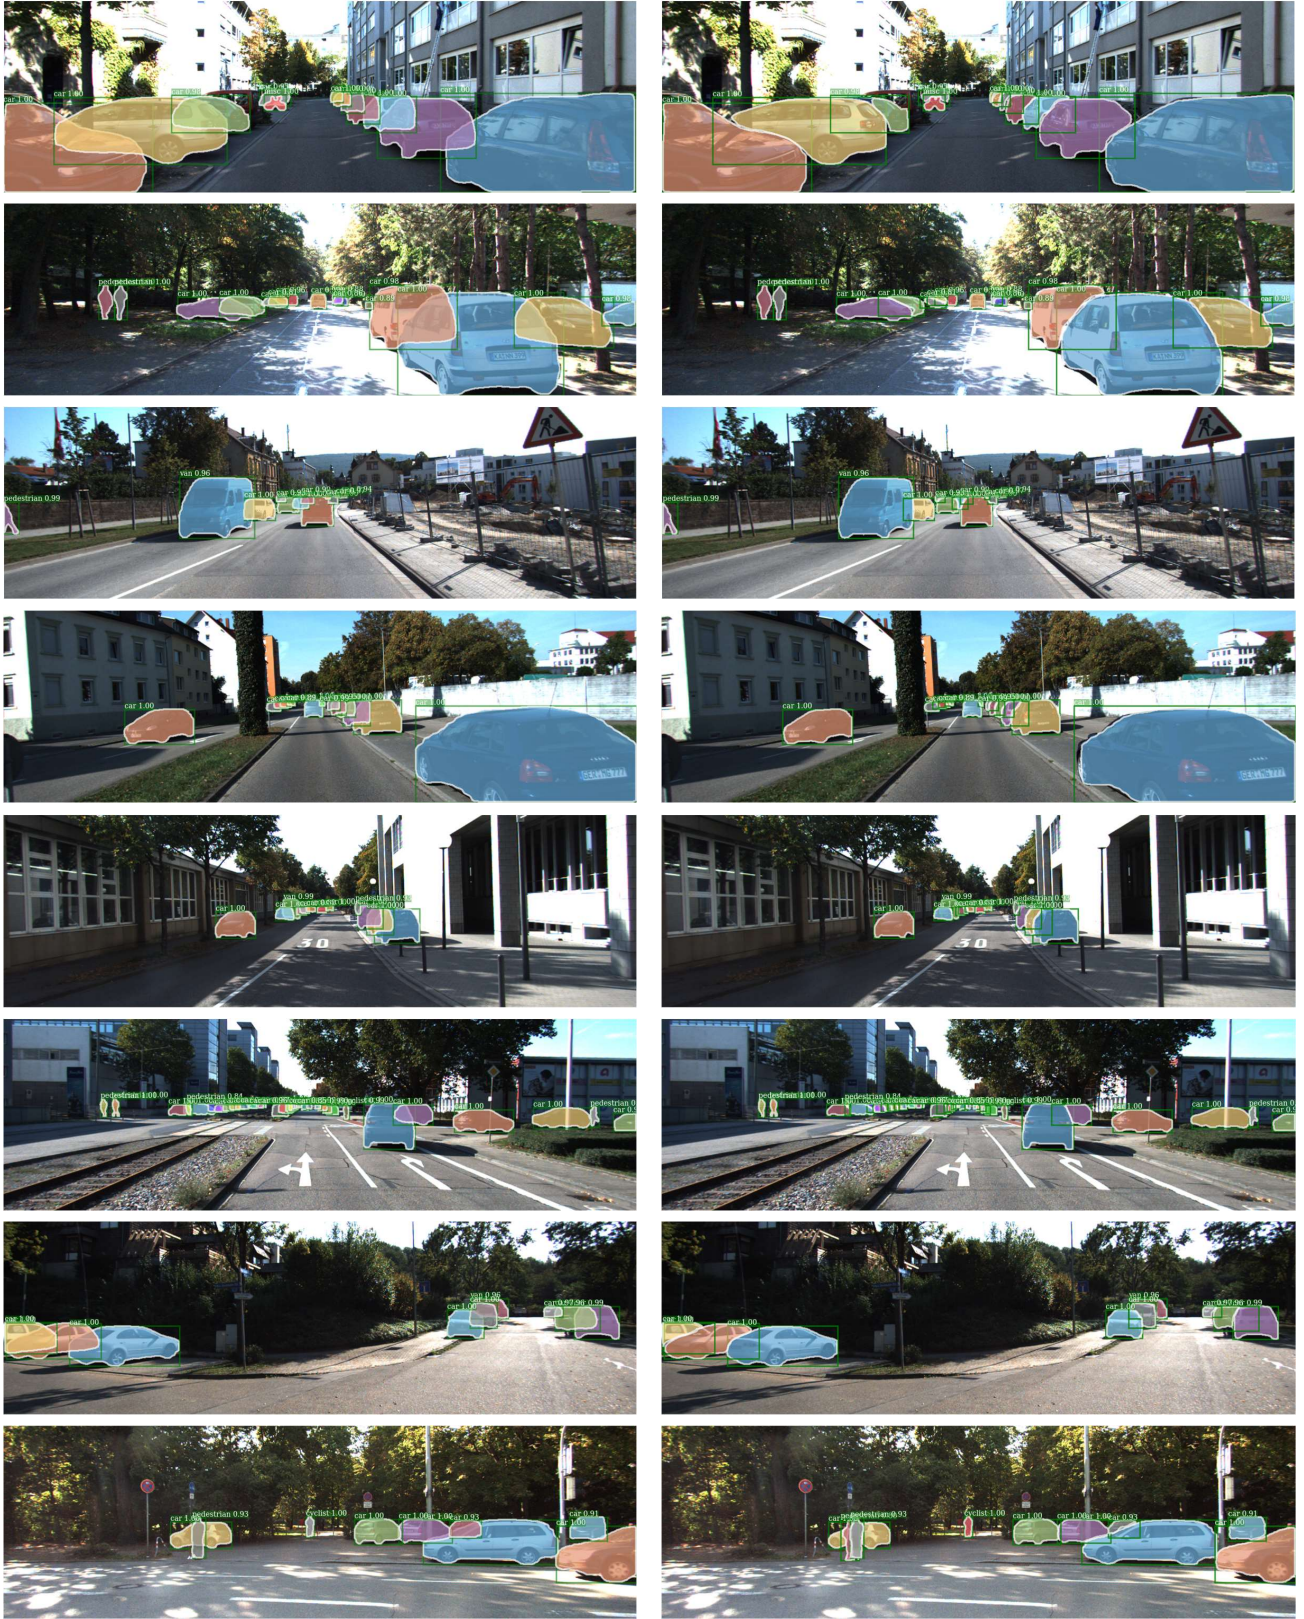

(a)

(b)

Figure 3. The Visualization of amodal segmentation network on KINS. (a) Amodal mask. (b) Inmodal mask.



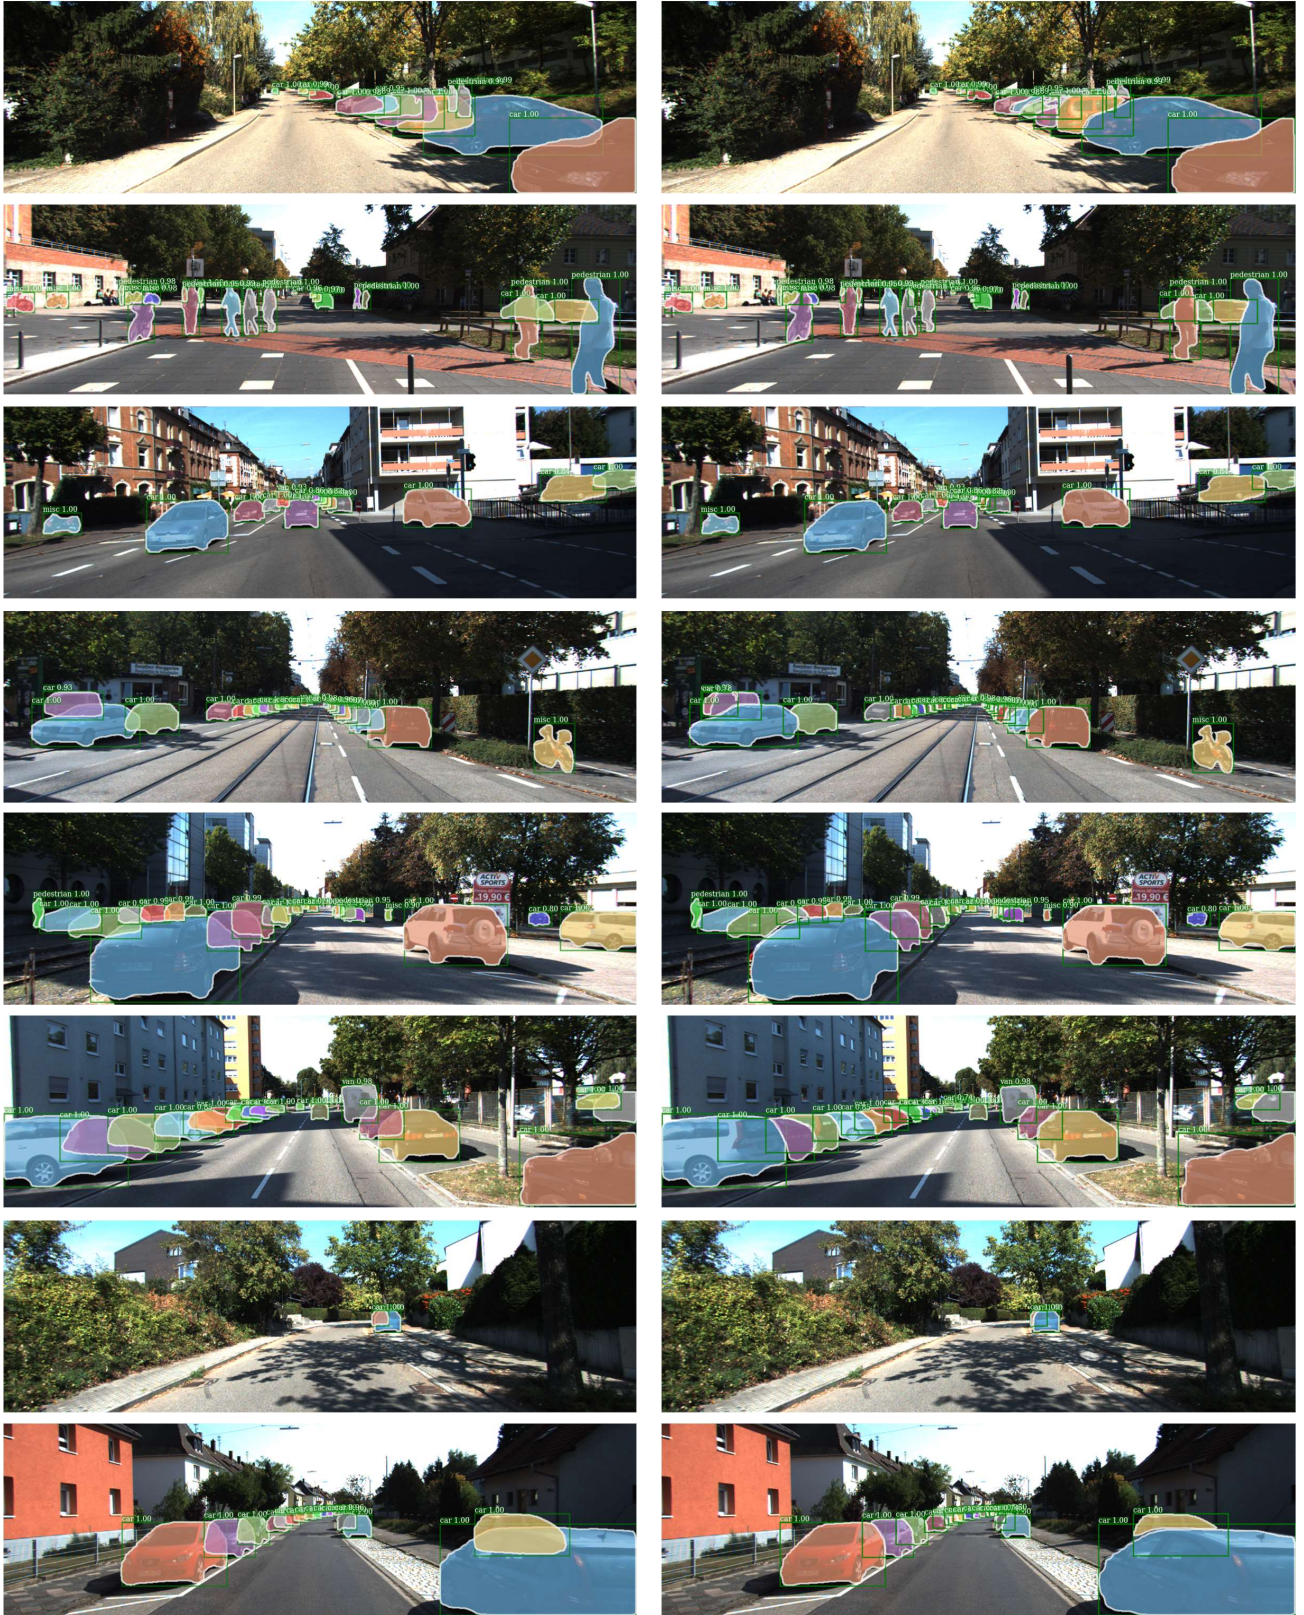

(a)

(b)

Figure 4. The Visualization of amodal segmentation network on KINS. (a) Amodal mask. (b) Inmodal mask.
